# Supplementary material for: Broad Epitope Coverage of Therapeutic Multi-Antibody Combinations Targeting SARS-CoV-2 Boosts In Vivo Protection and Neutralization Potency to Corner an Immune-Evading Virus
Source: MDPI journal article supplement (doi:10.3390/biomedicines12030642), 2024-03-13
Supplement: s1 [file s1]

## Supplementary Materials

**Figure S1:** Example data for assays described in methods section 2.10-2.13.

### 1a. 2.10 *In Silico* Developability Analysis and Manufacturability Optimization

Example data for the identification of the glycosylation site in the framework of the VH of 22-D9

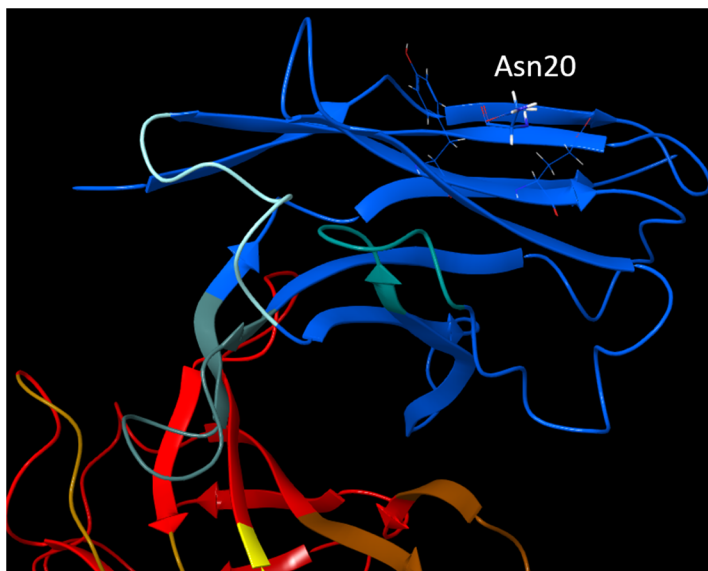

Homology model of 22-D9. The VH domain is presented in blue with the CDR highlighted in different shades of blue. The asparagine at position 20 in framework 1 is solvent exposed and identified as potential glycosylation site.

### 1b. 2.11 *HPLC* -Based Analysis

Example HPLC data for 2 benchmarks and 2 lead mAbs is provided.

#### 2.11.1 Example data SEC-HPLC

NISTmAb

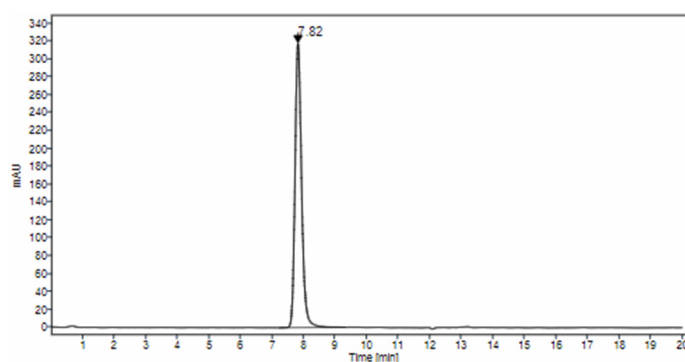

### Bococizumab

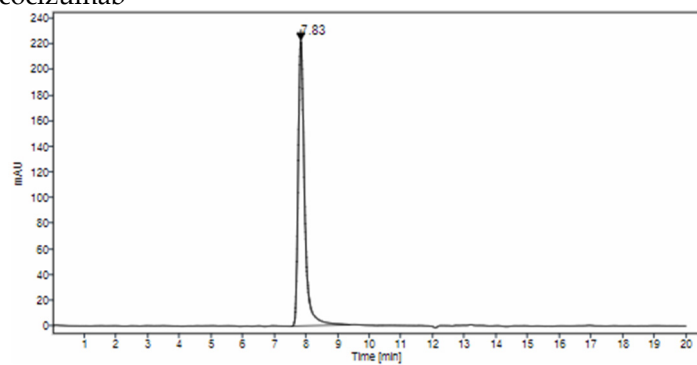

### 23-H7

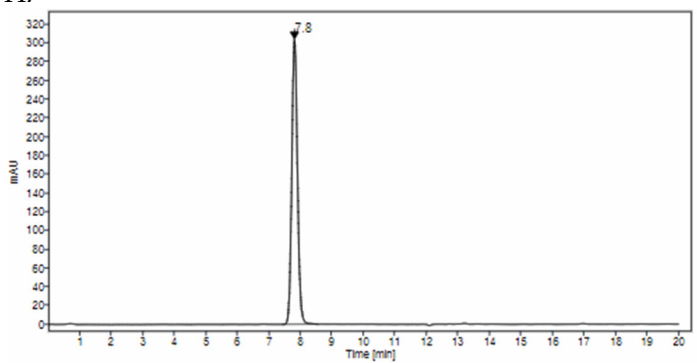

### 22-D9

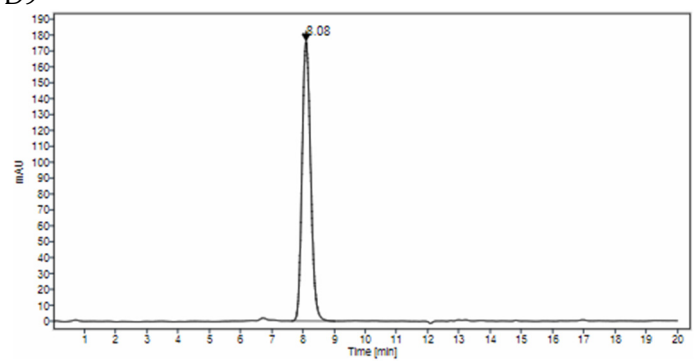

## 2.11.2 Example data CIC-HPLC

### NISTmAb

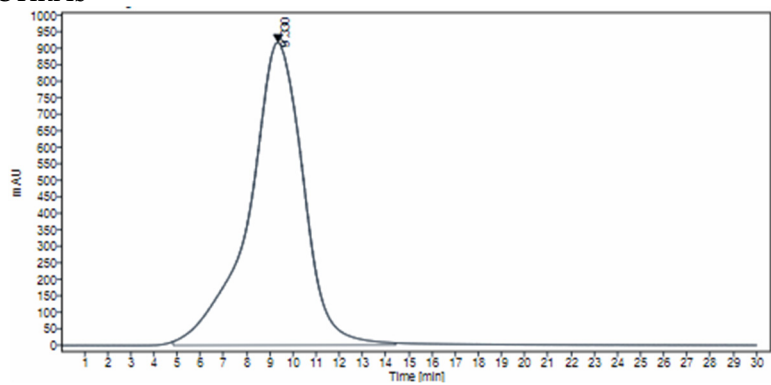

CNTO607

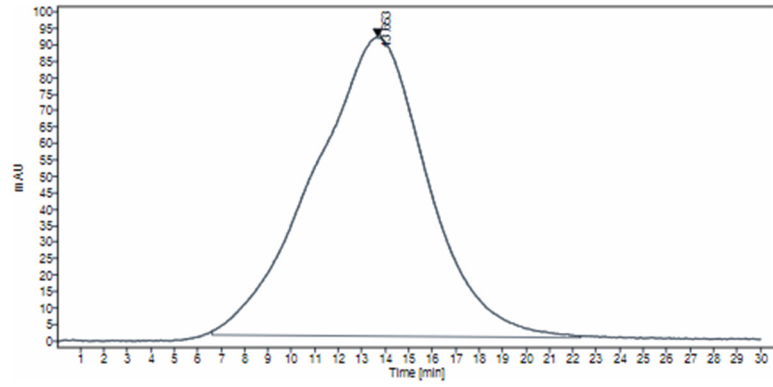

23-H7

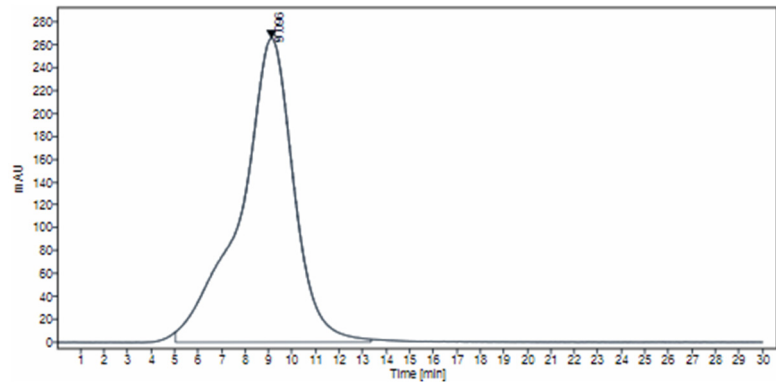

22-D9

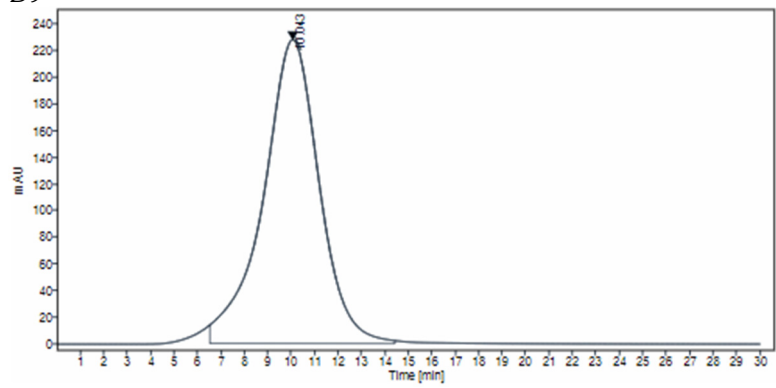

### 2.11.3 Example data SMAC-HPLC

NISTmAb

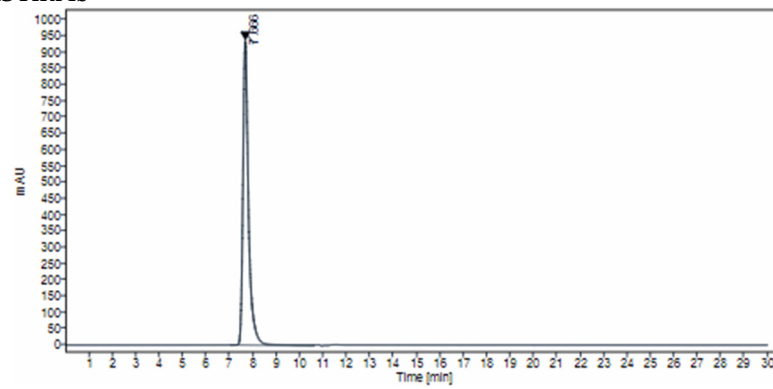

### Bococizumab

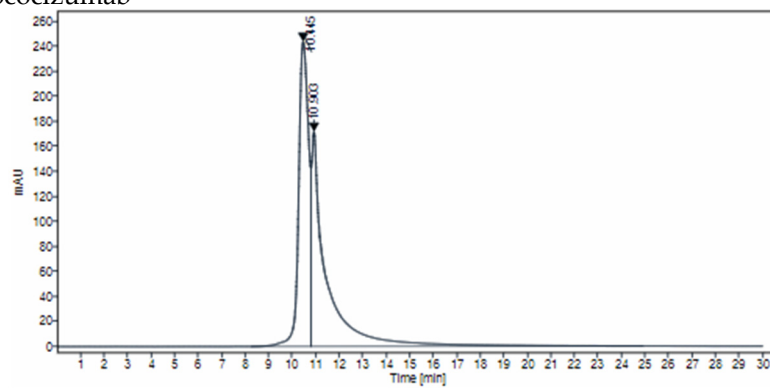

### 23-H7

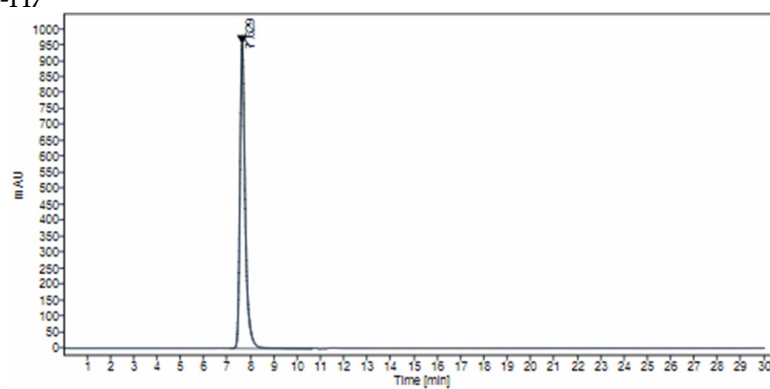

### 22-D9

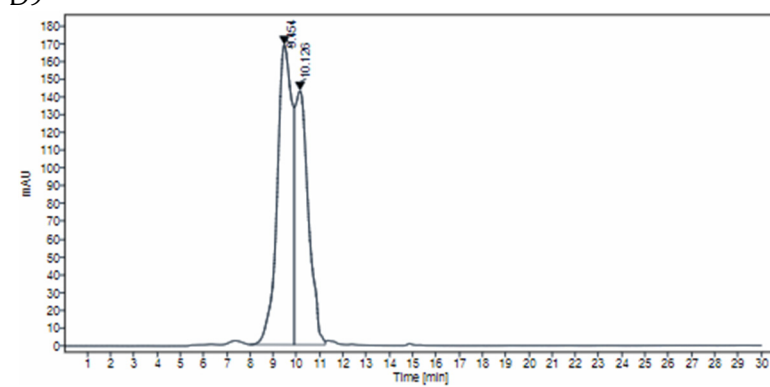

## 1c. 2.12 Capillary Electrophoresis (CE)

Example data CE

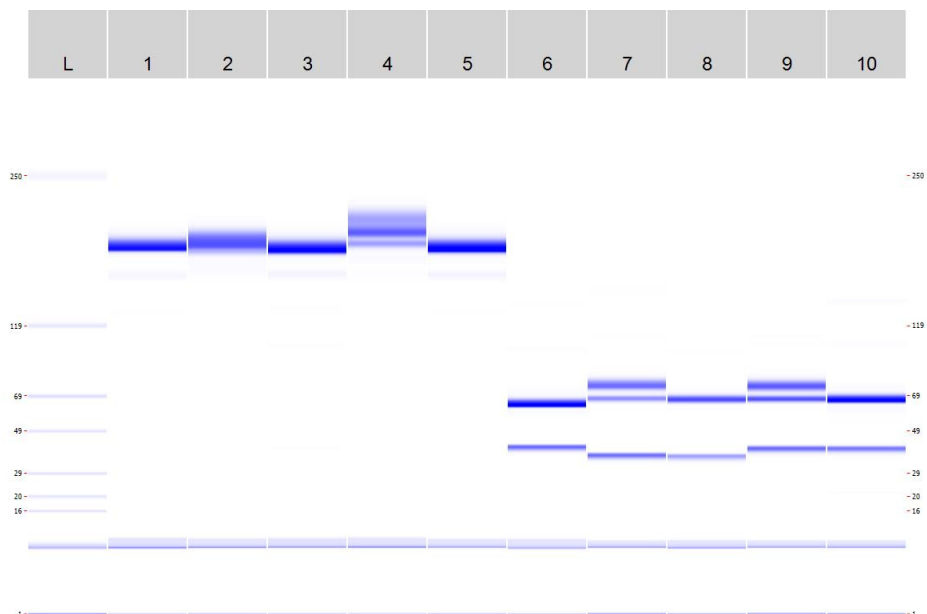

| L  | Molecular weight marker | Non-reduced |
|----|-------------------------|-------------|
| 1  | 23-H7                   | Non-reduced |
| 2  | 22-D9-wt                | Non-reduced |
| 3  | 22-D9-N20K              | Non-reduced |
| 4  | 21-F2-wt                | Non-reduced |
| 5  | 21-F2-N92Q              | Non-reduced |
| 6  | 23-H7                   | Reduced     |
| 7  | 22-D9-wt                | Reduced     |
| 8  | 22-D9-N20K              | Reduced     |
| 9  | 21-F2-wt                | Reduced     |
| 10 | 21-F2-N92Q              | Reduced     |

#### 1d. 2.13 Assessment of Solubility

Representative example data of the PEG4000 solubility assay

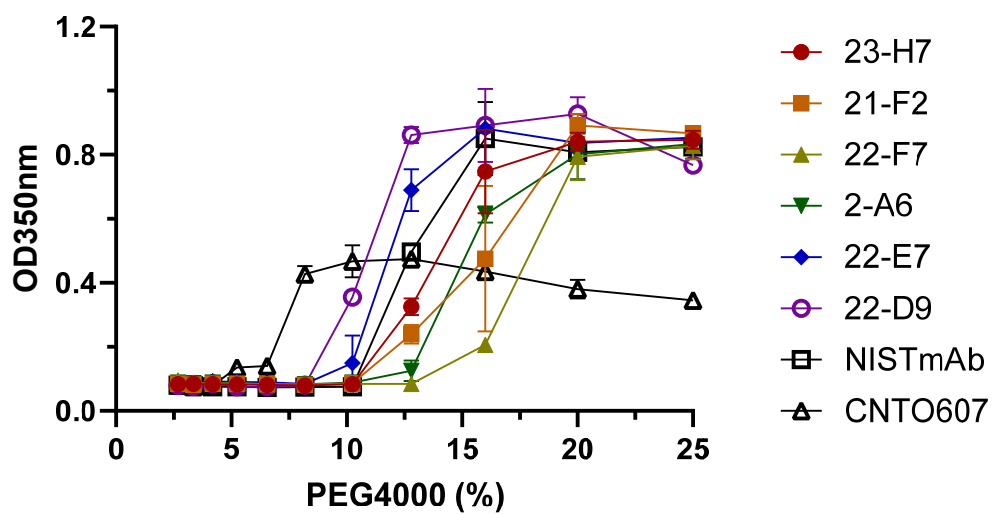

**Figure S2.** ADCP induction as measured by cellular Fc $\gamma$ R activation in a reporter cell line.

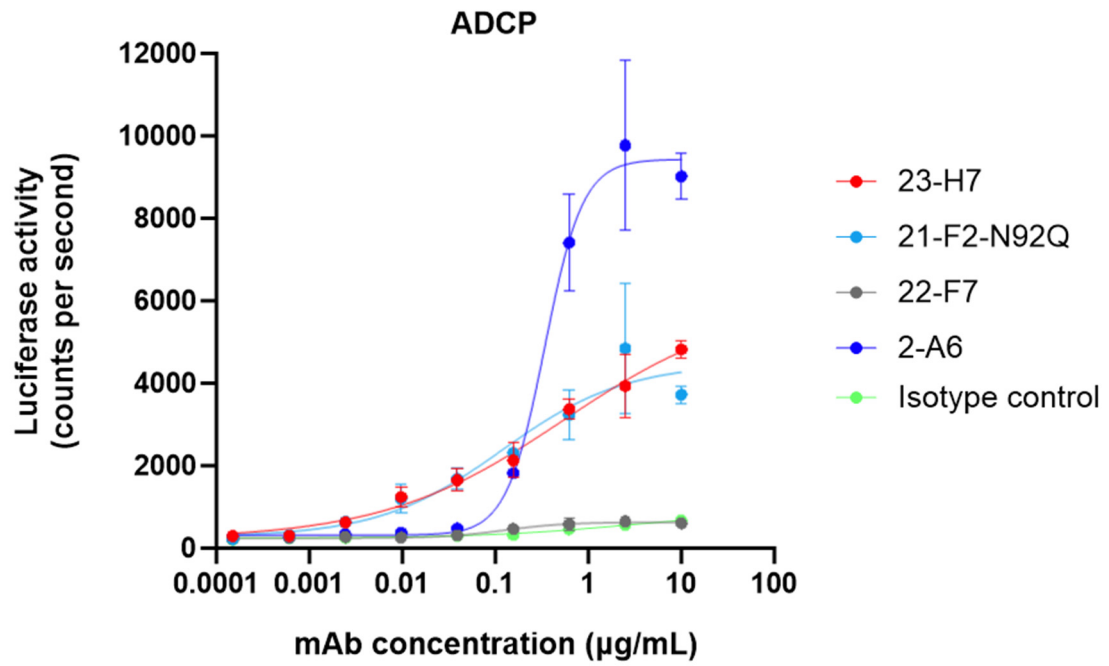

presence of SARS-CoV-2 target cells and THP-1 phagocytosis reporter cells (ADCP). Cellular Fc $\gamma$ R activation was measured through luciferase reporter activity. In each independent analysis run, the highest averaged luciferase activity was set to 1.
